# Supplementary material for: Green up-conversion luminescence of Yb3+-Er3+ co-doped CaLa2ZnO5 for optically temperature sensing
Source: Royal Society of Chemistry journal article supplement (doi:10.1039/c3ra47264g), 2014-01-01
Supplement: c3ra47264g.pdf [file c3ra47264g.pdf]

## Supporting Information

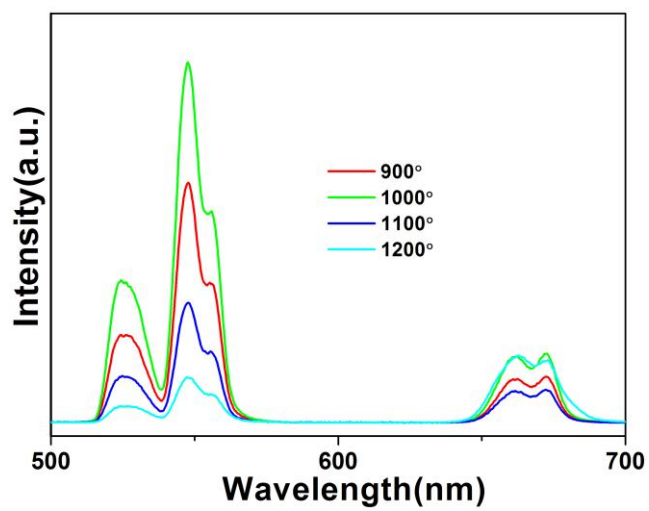

Fig. S1 UC luminescence of  $\text{CaLa}_{1.93}\text{Yb}_{0.05}\text{Er}_{0.02}\text{ZnO}_5$  phosphors annealed at different temperature.

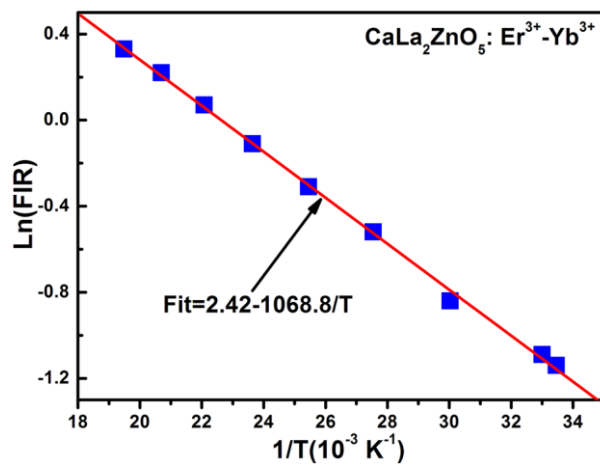

**Fig. S2** Monolog plot of the FIR of green upconversion emissions for the  ${}^2\text{H}_{11/2}$ ,  ${}^4\text{S}_{3/2} \rightarrow {}^4\text{I}_{15/2}$  transitions as a function of inverse absolute temperature in the range of 298-513 k.
